# Supplementary material for: Implementation of a Renal Precision Medicine Program: Clinician Attitudes and Acceptance
Source: Life (Basel). 2020 Mar 26;10(4):32. doi: 10.3390/life10040032 (PMC7235993; doi:10.3390/life10040032)
Supplement: Supplementary file 1 [file life-10-00032-s001.xlsx]

## Sheet: Sheet1
	Question	LIKERT	Q5A+SA	Q5SDA+DA+N	P Value	Q7A+SA	Q7SDA+DA+N	P Value	Q14A+SA	Q14SDA+DA+N	P Value	Q15A+SA	Q15SDA+DA+N	P Value	Q16A+SA	Q16SDA+DA+N	P Value	Q20A+SA	Q20SDA+DA+N	P Value
			n=34	n=41		n=47	n=29		n=25	n=51		n=50	n=26		n=31	n=45		n=52	n=24
Knowledge	1. A patient's genetic profile can influence their risk of CKD progression.	Agree/Strongly Agree	34 (100%)	35 (85.4%)	0.110814	45 (95.7%)	25 (86.2%)	0.00200082	25 (100%)	45 (88.2%)	0.211817	47 (94.0%)	23 (88.5%)	0.0803989	31 (100%)	39 (86.7%)	0.00776613	50 (96.2%)	20 (83.3%)	0.196529
		Neutral/Disagree/Strongly Disagree	0 (0%)	6 (14.6%)		2 (4.3%)	4 (13.8%)		0 (0%)	6 (11.8%)		3 (6.0%)	3 (11.5%)		0 (0%)	6 (13.3%)		2 (3.8%)	4 (16.7%)
Action	2. Genetic testing will help me to better diagnose the cause of my patient's CKD.	Agree/Strongly Agree	32 (94.1%)	19 (46.3%)	8.88312e-05	37 (78.7%)	14 (48.3%)	0.00979561	22 (88.0%)	29 (56.9%)	0.0267711	36 (72.0%)	15 (57.7%)	0.492988	27 (87.1%)	24 (53.3%)	0.00418386	43 (82.7%)	8 (33.3%)	4.41405e-05
		Neutral/Disagree/Strongly Disagree	2 (5.9%)	22 (53.7%)		10 (21.3%)	15 (51.7%)		3 (12.0%)	22 (43.1%)		14 (28.0%)	11 (42.3%)		4 (12.9%)	21 (46.7%)		9 (17.3%)	16 (66.7%)
Attitude	3. Patients and their families can benefit from understanding genetic contributors to their CKD.	Agree/Strongly Agree	30 (88.2%)	33 (80.5%)	0.047304	42 (89.4%)	22 (75.9%)	0.434609	23 (92.0%)	41 (80.4%)	0.294465	41 (82.0%)	23 (88.5%)	0.178081	29 (93.5%)	35 (77.8%)	0.145901	47 (90.4%)	17 (70.8%)	0.0351937
		Neutral/Disagree/Strongly Disagree	4 (11.8%)	8 (19.5%)		5 (10.6%)	7 (24.1%)		2 (8.0%)	10 (19.6%)		9 (18.0%)	3 (11.5%)		2 (6.5%)	10 (22.2%)		5 (9.6%)	7 (29.2%)
Action	4. Genetic testing of my CKD patients provides information that may change my therapeutic management of patients.a	Agree/Strongly Agree	31 (91.2%)	23 (56.1%)	0.00063252	38 (80.9%)	16 (55.2%)*	0.00499231	22 (88.0%)	32 (62.7%)*	0.00496385	35 (70.0%)	19 (73.1%)*	0.0125819	28 (90.3%)*	26 (57.8%)	0.00312165	45 (86.5%)	9 (37.5%)*	3.12444e-05
		Neutral/Disagree/Strongly Disagree	3 (8.8%)	18 (43.9%)		9 (19.1%)	12 (41.4)*		3 (12.0%)	18 (35.3%)*		15 (30.0%)	6 (23.1%)*		2 (6.5%)*	19 (42.2%)		7 (13.5%)	14 (58.3%)*
Action	5. Genetic testing of my CKD patients provides information that changes dialysis preparation strategies in my patients.b	Agree/Strongly Agree				26 (55.3%)	8 (27.6%)*	0.0541568	16 (64.0%)	18 (35.3%)*	0.126622	26 (52.0%)	8 (30.8%)*	0.0867639	20 (64.5%)*	14 (31.1%)	0.0103756	30 (57.7%)	4 (16.7%)*	0.00251272
		Neutral/Disagree/Strongly Disagree				21 (44.7%)	20 (69.0%)*		9 (36.0%)	32 (62.7%)*		24 (48.0%)	17 (65.4%)*		10 (32.3%)*	31 (68.9%)		22 (42.3%)	19 (79.2%)*
Action	6. Genetic testing for CKD provides information that will help me delay or halt the progression of CKD in my patients.	Agree/Strongly Agree	20 (58.8%)	18 (43.9%)	0.164445	27 (57.4%)	11 (37.9%)	0.0535431	18 (72.0%)	20 (39.2%)	0.0137945	27 (54.0%)	11 (42.3%)	0.0962806	20 (64.5%)	18 (40.0%)	0.109494	32 (61.5%)	6 (25.0%)	0.0132485
		Neutral/Disagree/Strongly Disagree	14 (41.2%)	23 (56.1%)		20 (42.6%)	18 (62.1%)		7 (28.0%)	31 (60.8%)		23 (46.0%)	15 (57.7%)		11 (35.5%)	27 (60.0%)		20 (38.5%)	18 (75.0%)
Action	7. The presence of 2 APOL1 risk alleles in a potential donor would impact the decision to donate a kidney for transplantion.	Agree/Strongly Agree	26 (76.5%)	21 (51.2%)	0.0509408				22 (88.0%)	25 (49.0%)	0.00968856	37 (74.0%)	10 (38.5%)	0.00530037	26 (83.9%)	21 (46.7%)	0.000792696	38 (73.1%)	9 (37.5%)	0.00841184
		Neutral/Disagree/Strongly Disagree	8 (23.5%)	20 (48.8%)					3 (12.0%)	26 (51.0%)		13 (26.0%)	16 (61.5%)		5 (16.1%)	24 (53.3%)		14 (26.9%)	15 (62.5%)
Action	8. The presence of 2 APOL1 risk alleles in a patient would impact my management of Focal Segmental Glomerulosclerosis (FSGS).	Agree/Strongly Agree	23 (67.6%)	22 (53.7%)	0.634646	41 (87.2%)	4 (13.8%)	3.6877e-10	21 (84.0%)	24 (47.1%)	0.00518333	36 (72.0%)	9 (34.6%)	0.00573401	22 (71.0%)	23 (51.1%)	0.0259863	36 (69.2%)	9 (37.5%)	0.0353478
		Neutral/Disagree/Strongly Disagree	11 (32.4%)	19 (46.3%)		6 (12.8%)	25 (86.2%)		4 (16.0%)	27 (52.9%)		14 (28.0%)	17 (65.4%)		9 (29.0%)	22 (48.9%)		16 (30.8%)	15 (62.5%)
Attitude	9. I personally review and discuss a family history (taken by myself or a physician-in-training/nurse/physician extender) for every patient I meet in the hospital or in a clinic.	Agree/Strongly Agree	32 (94.1%)	32 (78.0%)	0.213105	44 (93.6%)	20 (69.0 %)	0.0011975	23 (92.0%)	41 (80.4%)	0.4217	45 (90.0%)	19 (73.1%)	0.0858541	27 (87.1%)	37 (82.2%)	0.474325	47 (90.4%)	17 (70.8%)	0.0535728
		Neutral/Disagree/Strongly Disagree	2 (5.9%)	9 (22.0%)		3 (6.4%)	9 (31.0%)		2 (8.0%)	10 (19.6%)		5 (10.0%)	7 (26.9%)		4 (12.9%)	8 (17.8%)		5 (9.6%)	7 (29.2%)
Knowledge	10. Genetic testing is a valuable complement to a detailed family history.	Agree/Strongly Agree	26 (76.5%)	25 (61%)	0.559437	37 (78.7%)	14 (48.3%)	0.035488	22 (88.0%)	29 (56.9%)	0.0613797	38 (76.0%)	13 (50%)	0.0434437	28 (90.3%)	23 (51.1%)	0.00100175	40 (76.9%)	11 (45.8%)	0.0221358
		Neutral/Disagree/Strongly Disagree	8 (23.5%)	16 (39%)		10 (21.3%)	15 (51.7%)		3 (12.0%)	22 (43.1%)		12 (24.0%)	13 (50%)		3 (9.7%)	22 (48.9%)		12 (23.1%)	13 (54.2%)
Attitude	11. Discussing genetic testing results with patients will lead to increased patient anxiety.	Agree/Strongly Agree	16 (47.1%)	13 (31.7%)	0.00669649	21 (44.7%)	8 (27.6%)	0.293876	8 (32.0%)	21 (41.2%)	0.43113	19 (38.0%)	10 (38.5%)	0.368306	14 (45.2%)	15 (33.3%)	0.137399	23 (44.2%)	6 (25.0%)	0.155771
		Neutral/Disagree/Strongly Disagree	18 (52.9%)	28 (68.3%)		26 (55.3%)	21 (72.4%)		17 (68.0%)	30 (58.8%)		31 (62.0%)	16 (61.5%)		17 (54.8%)	30 (66.7%)		29 (55.8%)	18 (75.0%)
Attitude	12. Nephrologists should be trained to interpret and counsel patients on genetic variants that contribute to CKD.	Agree/Strongly Agree	32 (94.1%)	37 (90.2%)	0.725847	41 (87.2%)	23 (79.3%)	0.0149604	25 (100%)	44 (86.3%)	0.153261	47 (94.0%)	22 (84.6%)	0.0166346	30 (96.8%)	39 (86.7%)	0.294137	51 (98.1%)	18 (75.0%)	0.00404872
		Neutral/Disagree/Strongly Disagree	2 (5.9%)	4 (9.8%)		6 (12.8%)	6 (20.7%)		0 (0%)	7 (13.7%)		3 (6.0%)	4 (15.4%)		1 (3.2%)	6 (13.3%)		1 (1.9%)	6 (25.0%)
Attitude	13. Genetic counselors should be trained to interpret and counsel patients on genetic variants that contribute to CKD.	Agree/Strongly Agree	31 (91.2%)	39 (95.1%)	0.12959	45 (95.7%)	25 (86.2%)	0.333838	25 (100%)	45 (88.2%)	0.299986	48 (96.0%)	22 (84.6%)	0.00299119	29 (93.5%)	41 (91.1%)	0.805295	52 (100%)	18 (75.0%)	0.00275548
		Neutral/Disagree/Strongly Disagree	3 (8.8%)	2 (4.9%)		2 (4.3%)	4 (13.8%)		0 (0%)	6 (11.8%)		2 (4.0%)	4 (15.4%)		2 (6.5%)	4 (8.9%)		0 (0%)	6 (25.0%)
Knowledge	14. There is sufficient evidence to implement genetic testing in patients with CKD.	Agree/Strongly Agree	16 (47.1%)	9 (22.0%)	0.131389	22 (46.8%)	3 (10.3%)	0.00610363				22 (0.44%)	3 (11.5%)	0.0122067	13 (41.9%)	12 (26.7%)	0.184485	23 (44.2%)	2 (8.3%)	0.00508457
		Neutral/Disagree/Strongly Disagree	18 (52.9%)	32 (78.0%)		25 (53.2%)	26 (89.7%)					28 (56.0%)	23 (88.5%)		18 (58.1%)	33 (73.3%)		29 (55.8%)	22 (91.7%)
Knowledge	15. The benefits of genetic testing outweigh the risks to patients .	Agree/Strongly Agree	26 (76.5%)	24 (58.5%)	0.347741	37 (78.7%)	13 (44.8%)	0.0124034	22 (88.0%)	28 (54.9%)	0.0248966				26 (83.9%)	24 (53.3%)	0.0122839	39 (75.0%)	11 (45.8%)	0.0793601
		Neutral/Disagree/Strongly Disagree	8 (23.5%)	17 (41.5%)		10 (21.3%)	16 (55.2%)		3 (12.0%)	23 (45.1%)					5 (16.1%)	21 (46.7%)		13 (25.0%)	13 (54.2%)
Attitude	16. I feel comfortable discussing genetic test results with patients.	Agree/Strongly Agree	20 (58.8%)	10 (24.4%)	0.00405016	26 (55.3%)	5 (17.2%)	0.00154443	13 (52.0%)	18 (35.3%)	0.171249	26 (52.0%)	5 (19.2%)	0.0648692				26 (50%)	5 (20.8%)	0.0193832
		Neutral/Disagree/Strongly Disagree	14 (41.2%)	31 (75.6%)		21 (44.7%)	24 (82.8%)		12 (48.0%)	33 (64.7%)		24 (48.0%)	21 (80.8%)					26 (50%)	19 (79.2%)
Attitude	17. A discussion of genetic test results is too time-consuming for a clinic encounter.	Agree/Strongly Agree	16 (47.1%)	17 (41.5%)	0.669837	19 (40.4%)	15 (51.7%)	0.432716	13 (52.0%)	21 (41.2%)	0.0860147	24 (48.0%)	10 (38.5%)	0.843083	13 (41.9%)	21 (46.7%)	0.641414	26 (50%)	8 (33.3%)	0.487776
		Neutral/Disagree/Strongly Disagree	18 (52.9%)	24 (58.5%)		28 (59.6%)	14 (48.3%)		12 (48.0%)	30 (58.8%)		26 (52.0%)	16 (61.5%)		18 (58.1%)	24 (53.3%)		26 (50%)	16 (66.7%)
Knowledge	18. Genetic testing may help me better treat my patient's hypertension.	Agree/Strongly Agree	30 (88.2%)	26 (63.4%)	0.0060261	40 (85.1%)	17 (58.6%)	0.0439138	21 (84.0%)	36 (70.6%)	8.3223e-05	42 (84.0%)	15 (57.7%)	0.0262204	26 (83.9%)	31 (68.9%)	0.0706644	46 (88.5%)	11 (45.8%)	0.000133223
		Neutral/Disagree/Strongly Disagree	4 (11.8%)	15 (36.6%)		7 (14.9%)	12 (41.4%)		4 (16.0%)	15 (29.4%)		8 (16.0%)	11 (42.3%)		5 (16.1%)	14 (31.1%)		6 (11.5%)	13 (54.2%)
Knowledge	19. A patient's genetic profile can influence their therapeutic response to antihypertensives.	Agree/Strongly Agree	32 (94.1%)	28 (68.3%)	0.00406103	41 (87.2%)	20 (69.0 %)	0.0312979	24 (96.0%)	37 (72.5%)	0.0133947	44 (88.0%)	17 (65.4%)	0.0345603	29 (93.5%)	32 (71.1%)	0.00384971	51 (98.1%)	10 (41.7%)	1.63829e-08
		Neutral/Disagree/Strongly Disagree	2 (5.9%)	13 (31.7%)		6 (12.8%)	9 (31.0%)		1 (4.0%)	14 (27.5%)		6 (12.0%)	9 (34.6%)		2 (6.5%)	13 (28.9%)		1 (1.9%)	14 (58.3%)
Knowledge	20. Genetic testing of my HTN patients provides information that may change the antihypertensives that I prescribe.	Agree/Strongly Agree	30 (88.2%)	22 (53.7%)	0.002687	38 (80.9%)	14 (48.3%)	0.0280968	23 (92.0%)	29 (56.9%)	0.0128677	39 (78.0%)	13 (50%)	0.0149561	26 (83.9%)	26 (57.8%)	0.00554461
		Neutral/Disagree/Strongly Disagree	4 (11.8%)	19 (46.3%)		9 (19.1%)	15 (51.7%)		2 (8.0%)	22 (43.1%)		11 (22.0%)	13 (50%)		5 (16.1%)	19 (42.2%)
Knowledge	21. Genetic testing of my HTN patients provides information that may help me better achieve the recommended blood pressure goals.	Agree/Strongly Agree	29 (85.3%)	19 (46.3%)	0.000105643	36 (76.6%)	13 (44.8%)	0.0192745	21 (84.0%)	28 (54.9%)	0.0250466	37 (74.0%)	12 (46.2%)	0.0282595	25 (80.6%)	24 (53.3%)	0.00063133	47 (90.4%)	2 (8.3%)	6.80126e-12
		Neutral/Disagree/Strongly Disagree	5 (14.7%)	22 (53.7%)		11 (23.4%)	16 (55.2%)		4 (16.0%)	23 (45.1%)		13 (26.0%)	14 (53.8%)		6 (19.4%)	21 (46.7%)		5 (9.6%)	22 (91.7%)
Action	22. Provided no contraindications exist, I would follow the dosing suggestions of a pharmacogenomic test for a NEW prescription if the test indicated an alternate medication or dose was appropriate.	Agree/Strongly Agree	26 (76.5%)	33 (80.5%)	0.286136	41 (87.2%)	19 (65.5%)	0.0898298	22 (88.0%)	38 (74.5%)	0.5304	45 (90.0%)	15 (57.7%)	0.0018141	26 (83.9%)	34 (75.6%)	0.444167	42 (80.8%)	18 (75.0%)	0.798881
		Neutral/Disagree/Strongly Disagree	8 (23.5%)	8 (19.5%)		6 (12.8%)	10 (34.5%)		3 (12.0%)	13 (25.5%)		5 (10.0%)	11 (42.3%)		5 (16.1%)	11 (24.4%)		10 (19.2%)	6 (25.0%)
Action	23. Provided no contraindications exist, I would change an EXISTING prescription, one in which the patient had a stable response, in order to follow the dosing suggestions of a pharmacogenomic test if the test indicated an alternate medication or dose was appropriate.	Agree/Strongly Agree	19 (55.9%)	21 (51.2%)	0.140869	24 (51.1%)	17 (58.6%)	0.205735	16 (64.0%)	25 (49.0%)	0.266926	30 (60.0%)	11 (42.3%)	0.42073	16 (51.6%)	25 (55.6%)	0.342699	30 (57.7%)	11 (45.8%)	0.274392
		Neutral/Disagree/Strongly Disagree	15 (44.1%)	20 (48.8%)		23 (48.9%)	12 (41.4%)		9 (36.0%)	26 (51.0%)		20 (40.0%)	15 (57.7%)		15 (48.4%)	20 (44.4%)		22 (42.3%)	13 (54.2%)
